# Supplementary material for: A study on fluoride detection and assembly of hydroxyaromatic aldoximes caused by tetrabutylammonium fluoride
Source: Royal Society of Chemistry journal article supplement (doi:10.1039/c4ce02311k), 2015-01-01
Supplement: c4ce02311k1.pdf [file c4ce02311k1.pdf]

### Supporting information:

Study on fluoride detection and assembling of hydroxyaromatic aldoximes caused by tetrabutylammonium fluoride

Arup Tarai, Jubaraj B. Baruah\*

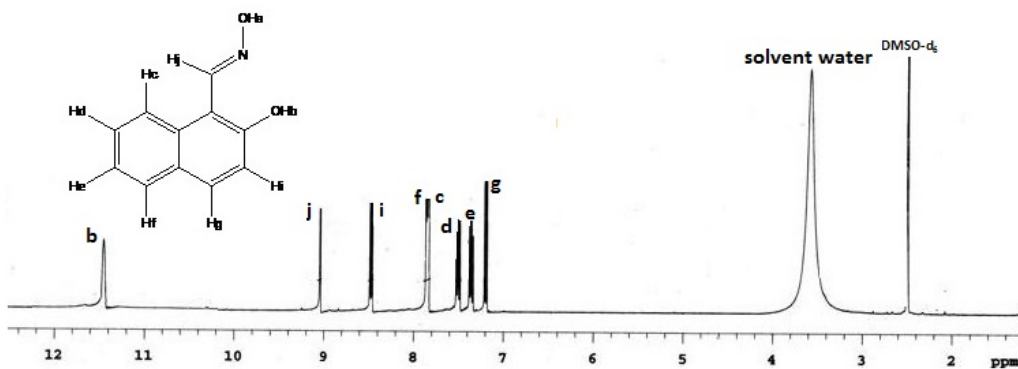

Figure 1S: <sup>1</sup>H-NMR (DMSO-d<sub>6</sub>) compound 1

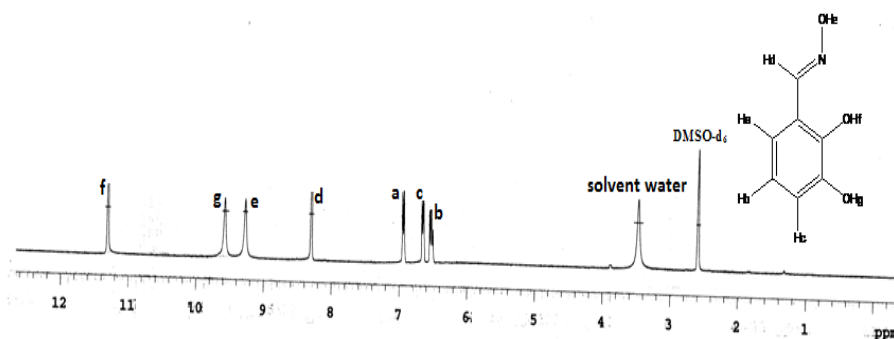

Figure 2S: <sup>1</sup>H-NMR (DMSO-d<sub>6</sub>) compound 2

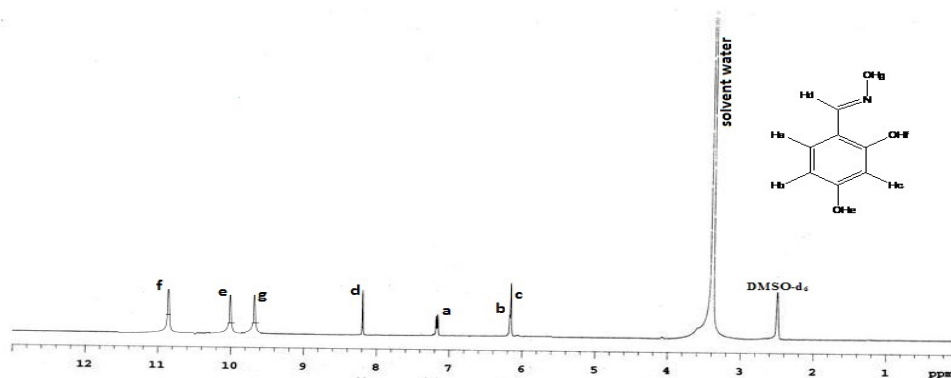

Figure 3S: <sup>1</sup>H-NMR (DMSO-d<sub>6</sub>) compound 3

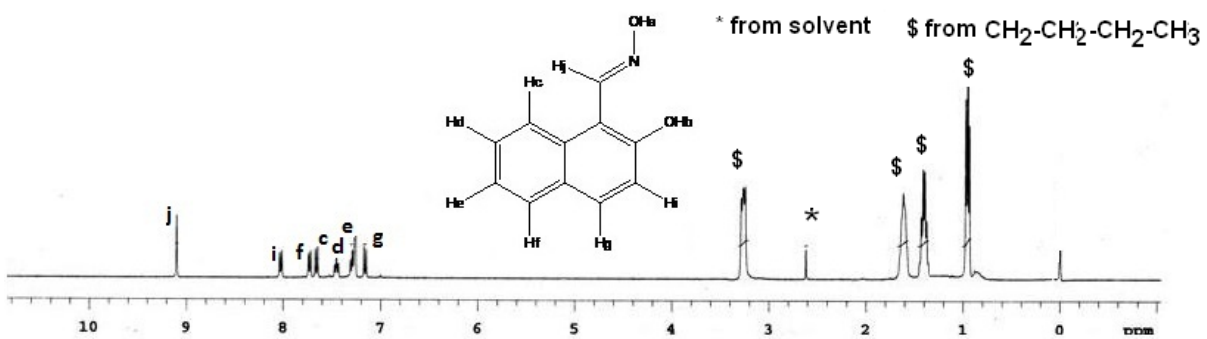

Figure 4S:  $^1\text{H-NMR}$  (DMSO- $\text{d}_6$ ) cocystal 4

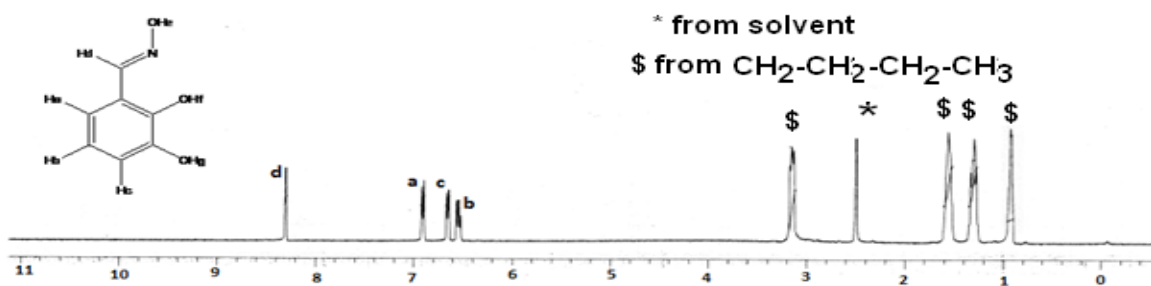

Figure 5S:  $^1\text{H-NMR}$  (DMSO- $\text{d}_6$ ) cocystal 5

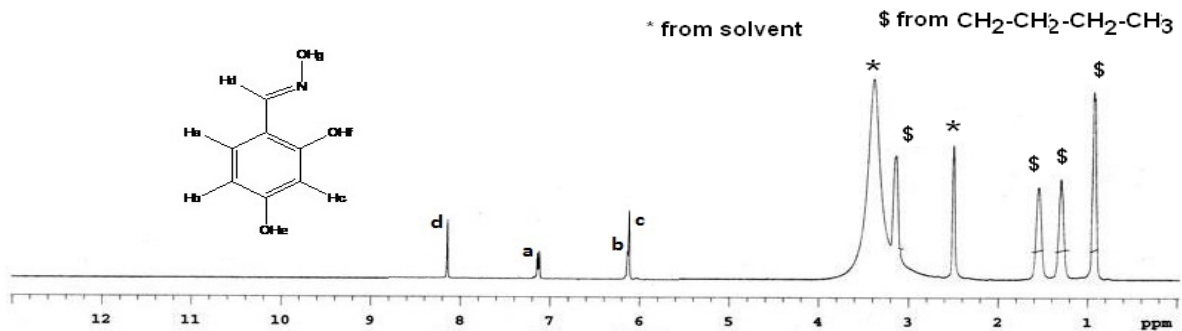

Figure 6S:  $^1\text{H-NMR}$  (DMSO- $\text{d}_6$ ) salt 6

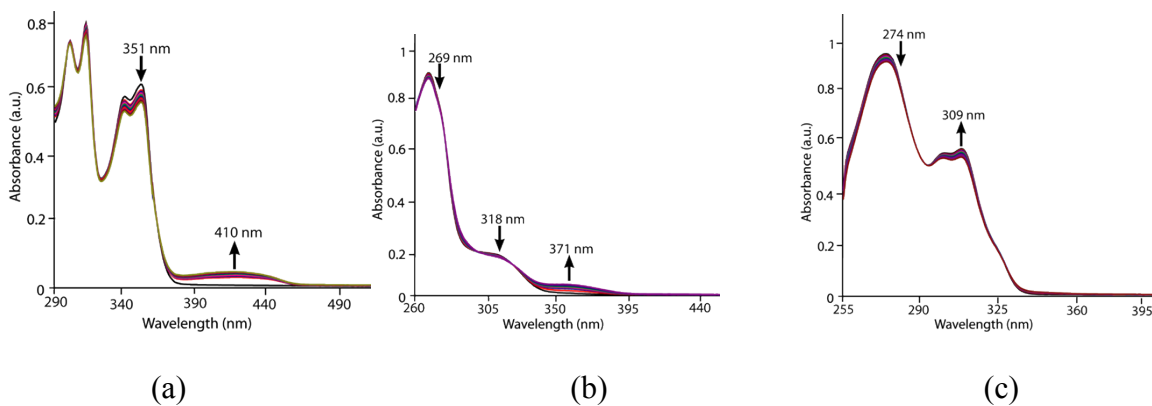

Figure 7S: UV-visible spectroscopic titration of tetrabutyl ammonium hydroxide (0  $\mu$ l-100  $\mu$ l of  $10^{-5}$  M solution) with (a) **1**; (b) **2** and (c) **3** ( $10^{-5}$  M solution in DMSO).
